# Supplementary material for: Effect of Pouch Size on Sterilization of Ready-to-Eat (RTE) Bracken Ferns: Numerical Simulation and Texture Evaluation
Source: MDPI journal article supplement (doi:10.3390/pr11010035), 2022-12-23
Supplement: s1 [file s1]

Supplementary Material

# Effect of Pouch Size on Sterilization of Ready-To-Eat (RTE) Bracken Ferns: Numerical Simulation and Texture Evaluation

Mesh convergence study

**Table S1.** Effect of mesh resolution on the average temperature and the cold point temperature of BF pouch.

| Sample | Mesh refinements | Number of elements | Average temperature at t = 10 min (°C) | Cold point temperature at t = 10 min (°C) | Maximum element size (mm) | Minimum element size (mm) |
|--------|------------------|--------------------|----------------------------------------|-------------------------------------------|---------------------------|---------------------------|
| 100 g  | Coarser          | 732                | 88.15                                  | 34.61                                     | 35.60                     | 7.49                      |
|        | Coarse           | 1646               | 87.97                                  | 33.54                                     | 28.10                     | 5.24                      |
|        | Normal           | 5434               | 88.03                                  | 34.89                                     | 18.70                     | 3.37                      |
|        | Fine             | 8731               | 87.82                                  | 35.14                                     | 15.00                     | 1.87                      |
|        | Finer            | 19172              | 87.73                                  | 35.43                                     | 10.30                     | 0.75                      |
|        | Extra fine       | 63871              | 87.75                                  | 35.48                                     | 6.55                      | 0.28                      |
|        | Extremely fine   | 291425             | 87.76                                  | 35.51                                     | 3.74                      | 0.04                      |
| 150 g  | Coarser          | 1337               | 77.99                                  | 20.5                                      | 35.70                     | 7.51                      |
|        | Coarse           | 2329               | 77.95                                  | 19.25                                     | 28.20                     | 5.26                      |
|        | Normal           | 5027               | 78.06                                  | 21.52                                     | 18.80                     | 3.38                      |
|        | Fine             | 11670              | 78.01                                  | 21.28                                     | 15.00                     | 1.88                      |
|        | Finer            | 20468              | 77.94                                  | 21.63                                     | 10.30                     | 0.75                      |
|        | Extra fine       | 69733              | 77.92                                  | 21.6                                      | 6.57                      | 0.28                      |
|        | Extremely fine   | 282467             | 77.93                                  | 21.56                                     | 3.76                      | 0.04                      |
| 200 g  | Coarser          | 1494               | 58.98                                  | 9.77                                      | 35.40                     | 7.46                      |
|        | Coarse           | 2631               | 56.99                                  | 13.76                                     | 28.00                     | 5.22                      |
|        | Normal           | 5399               | 55.78                                  | 14.91                                     | 18.60                     | 3.36                      |
|        | Fine             | 9960               | 56.28                                  | 15.18                                     | 14.90                     | 1.86                      |
|        | Finer            | 25597              | 55.95                                  | 15.47                                     | 10.30                     | 0.75                      |
|        | Extra fine       | 75568              | 55.54                                  | 15.61                                     | 6.52                      | 0.28                      |
|        | Extremely fine   | 333149             | 55.39                                  | 15.69                                     | 3.73                      | 0.04                      |

Mesh independence: Grid convergence index approach

Mesh independence was calculated by the grid convergence index (GCI) method (Celik et al., 2008). First, the representative mesh size  $h$  for three-dimensional calculations was defined as:

$$h = \left[ \frac{1}{N} \sum_{i=1}^N (\Delta V_i) \right]^{1/3} \quad (\text{S1})$$

where  $\Delta V_i$  is the volume of the  $i$ th cell, and  $N$  is the total number of cells in the computational domain.

The mesh configurations “Finer”, “Extra fine”, and “Extremely fine” in Table S1 were selected as three significantly different sets of grids to examine the adequacy of the mesh resolution. The grid refinement factor  $r$  was calculated as follows:

$$r_{21} = \frac{h_{\text{Extra fine}}}{h_{\text{Extremely fine}}}, \quad r_{32} = \frac{h_{\text{Finer}}}{h_{\text{Extra fine}}} \quad (\text{S2})$$

Then, the apparent order  $p$  of the method was calculated:

$$p = \frac{1}{\ln(r_{21})} |\ln|\varepsilon_{32}/\varepsilon_{21}| + q(p)| \quad (S3)$$

$$\varepsilon_{21} = \phi_2 - \phi_1, \quad \varepsilon_{32} = \phi_3 - \phi_2 \quad (S4)$$

where  $\phi_1$ ,  $\phi_2$ , and  $\phi_3$  are the solution (average temperature and cold point temperature in this study) on the “Extremely fine”, “Extra fine”, and “Finer” mesh configuration, respectively.  $q(p) = 0$  when  $r$  is constant.

Finally, GCI was determined using the following equations:

$$GCI_{21} = \frac{1.25e_a^{21}}{r_{21}^p - 1}, \quad GCI_{32} = \frac{1.25e_a^{32}}{r_{32}^p - 1} \quad (S5)$$

$$e_a^{21} = \left| \frac{\phi_1 - \phi_2}{\phi_1} \right|, \quad e_a^{32} = \left| \frac{\phi_2 - \phi_3}{\phi_2} \right| \quad (S6)$$

where  $e_a$  is approximate relative error.

The values defined by the Equations S1-S6 are listed in Table S2.

**Table S2.** Calculations of values using Equations S1-S6.

|                          | 100 g                                          |                                                   | 150 g                                          |                                                   | 200 g                                          |                                                   |
|--------------------------|------------------------------------------------|---------------------------------------------------|------------------------------------------------|---------------------------------------------------|------------------------------------------------|---------------------------------------------------|
|                          | Average tem-<br>perature at t =<br>10 min (°C) | Cold point tem-<br>perature at t =<br>10 min (°C) | Average tem-<br>perature at t =<br>10 min (°C) | Cold point tem-<br>perature at t =<br>10 min (°C) | Average tem-<br>perature at t =<br>10 min (°C) | Cold point tem-<br>perature at t =<br>10 min (°C) |
| $r_{21}, r_{32}$         | 1.66, 1.49                                     |                                                   | 1.59, 1.50                                     |                                                   | 1.43, 1.64                                     |                                                   |
| $P$                      | 1.37                                           | 1.01                                              | 1.49                                           | 0.62                                              | 2.04                                           | 1.13                                              |
| $e_a^{21}, e_a^{32}$ (%) | 0.02, 0.01                                     | 0.14, 0.09                                        | 0.03, 0.01                                     | 0.14, 0.19                                        | 0.73, 0.27                                     | 0.90, 0.51                                        |
| $GCI_{21}, GCI_{32}$ (%) | 0.03, 0.02                                     | 0.44, 0.32                                        | 0.03, 0.02                                     | 0.52, 0.81                                        | 0.53, 0.31                                     | 1.51, 1.27                                        |

### Time-step dependence analysis

**Table S3.** Effect of time-step on the average temperature and the cold point temperature of BF pouch.

| Sample | Time-step (min) | Average temperature at t = 10<br>min (°C) | Cold point temperature at t = 10<br>min (°C) |
|--------|-----------------|-------------------------------------------|----------------------------------------------|
| 100 g  | 2               | 88.20                                     | 35.81                                        |
|        | 1               | 87.91                                     | 35.56                                        |
|        | 0.5             | 87.75                                     | 35.46                                        |
|        | 0.1             | 87.75                                     | 35.46                                        |
|        | 0.01            | 87.75                                     | 35.46                                        |
| 150 g  | 2               | 78.38                                     | 21.92                                        |
|        | 1               | 78.11                                     | 21.69                                        |
|        | 0.5             | 77.92                                     | 21.6                                         |
|        | 0.1             | 77.92                                     | 21.6                                         |
|        | 0.01            | 77.92                                     | 21.6                                         |
| 200 g  | 2               | 55.79                                     | 15.71                                        |
|        | 1               | 55.61                                     | 15.63                                        |
|        | 0.5             | 55.54                                     | 15.61                                        |
|        | 0.1             | 55.54                                     | 15.61                                        |
|        | 0.01            | 55.54                                     | 15.61                                        |
